# Supplementary material for: Visible-light-responsive t-Se nanorod photocatalysts: synthesis, properties, and mechanism
Source: Royal Society of Chemistry journal article supplement (doi:10.1039/c5ra03895b), 2015-01-01
Supplement: c5ra03895b1.pdf [file c5ra03895b1.pdf]

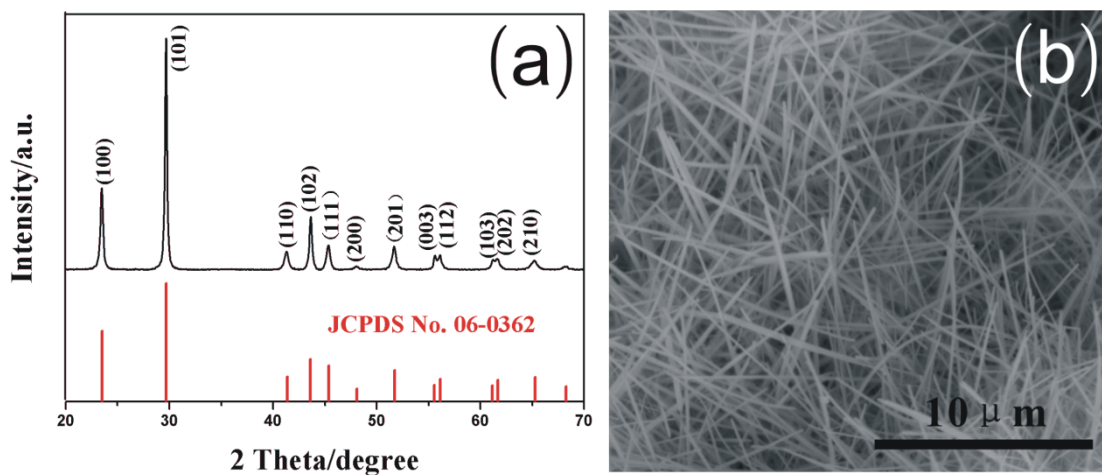

Fig. S1 XRD patterns (a) and SEM (b) image of the spent t-Se NRs after photocatalytic in the visible-Se NRs-H<sub>2</sub>O<sub>2</sub> systems

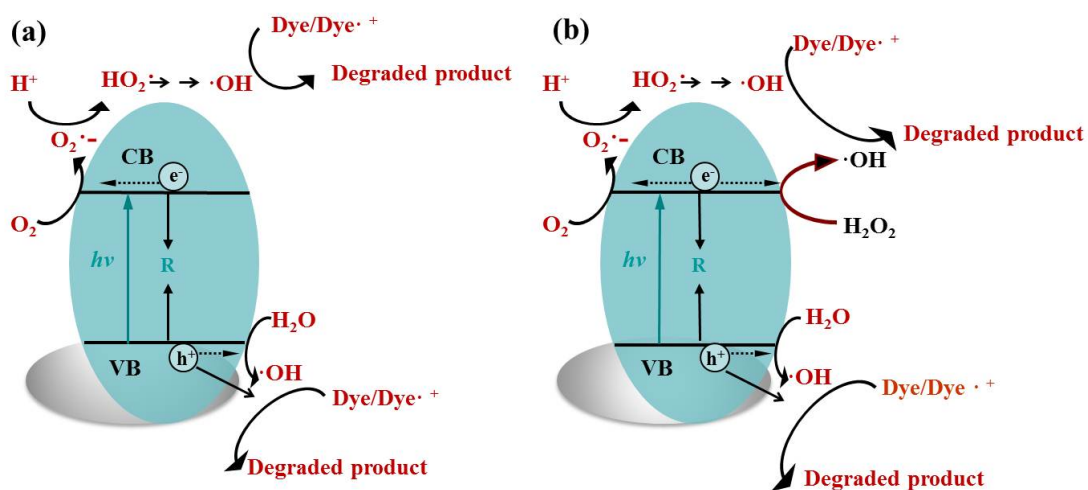

Fig. S2 Proposed mechanisms of t-Se NRs in the visible-SeNRs-HCl (a) and visible-SeNRs-H<sub>2</sub>O<sub>2</sub> (b) degradation of MO.
